# Supplementary material
Source: publisher figshare collection journal article supplement (https://tandf.figshare.com/articles/dataset/_/5319589)
Supplement: Supplementary file 3 [file 2]

Archive with 2 entries (2 files):
- supplementary_file.pdf
- supplementary_plots.zip
